# Supplementary figures and images for: HuR Plays a Role in Double-Strand Break Repair in Pancreatic Cancer Cells and Regulates Functional BRCA1-Associated-Ring-Domain-1(BARD1) Isoforms
Source: MDPI journal article supplement (doi:10.3390/cancers14071848), 2022-04-06

Fig 1d

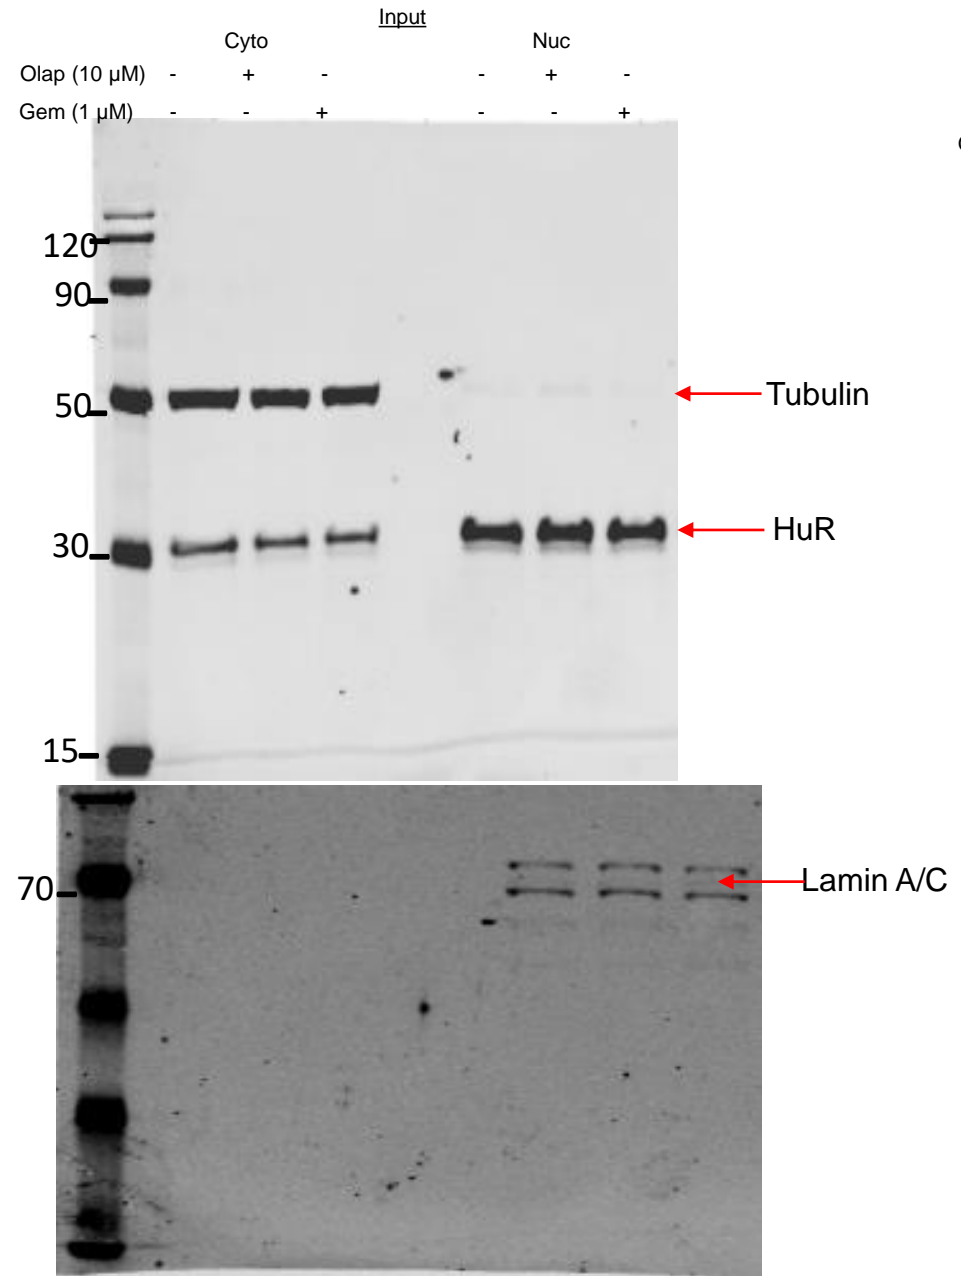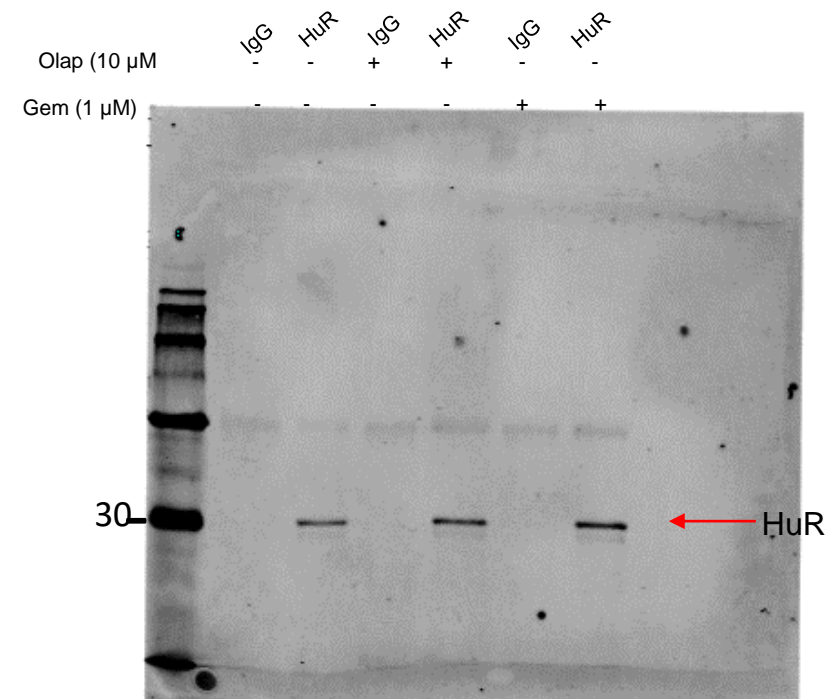

Fig 2d.

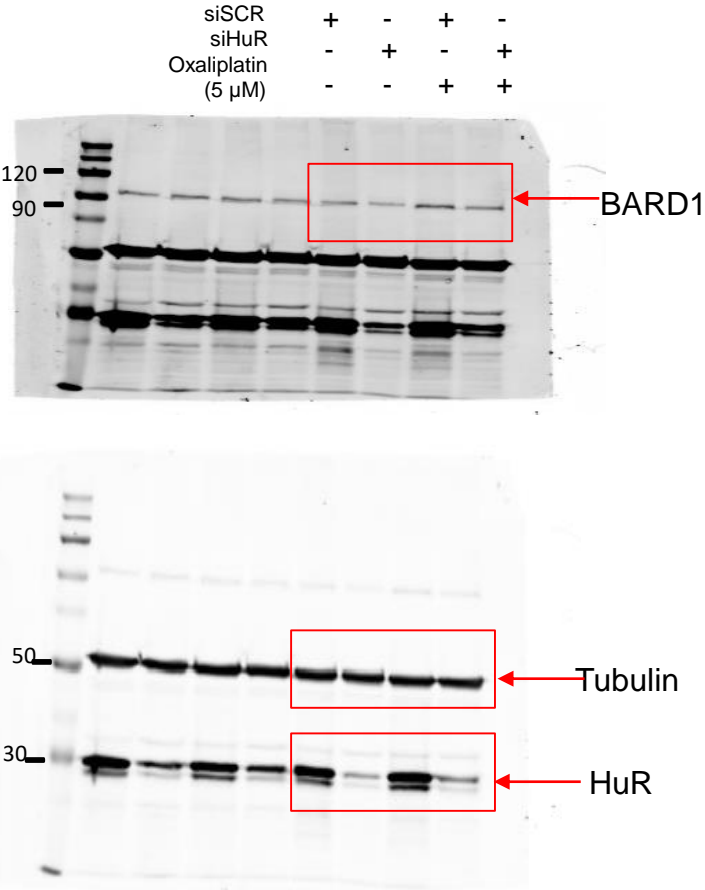

Fig 2e.

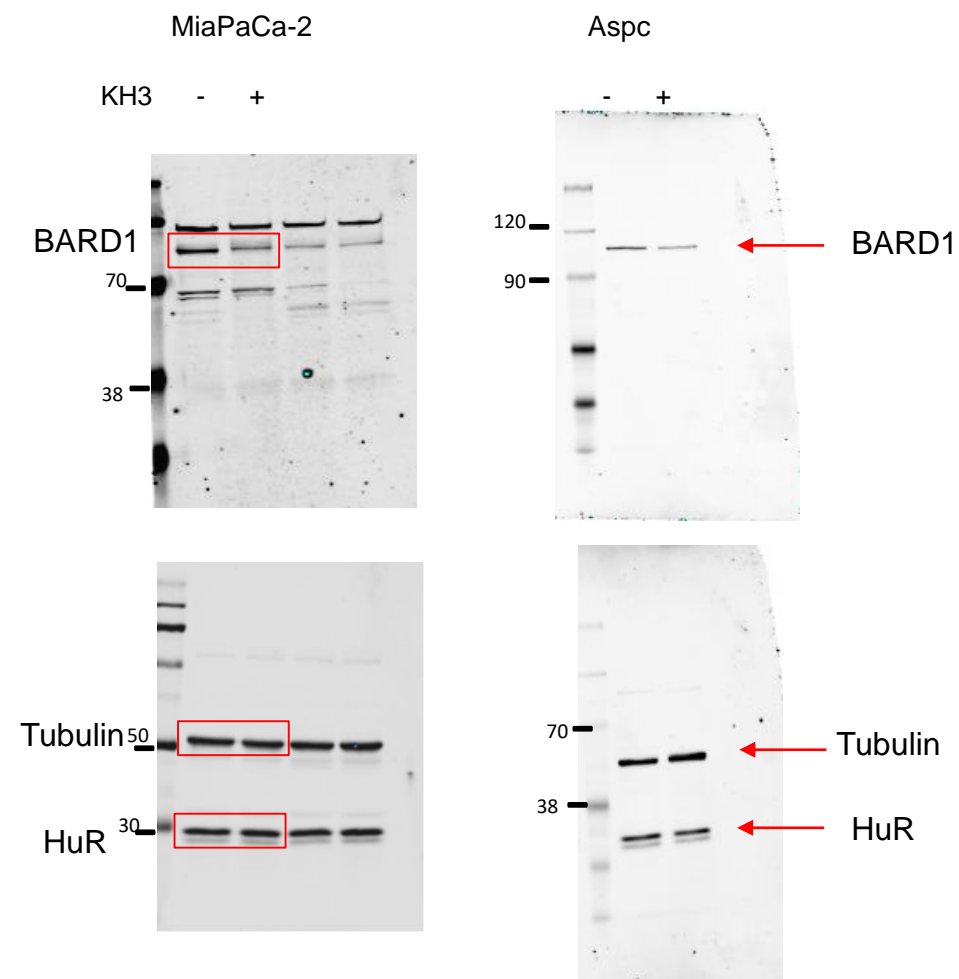

Fig S2a

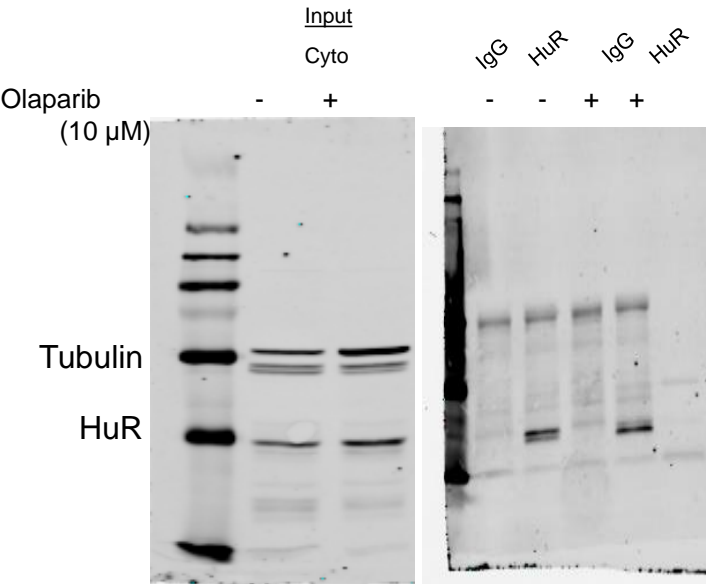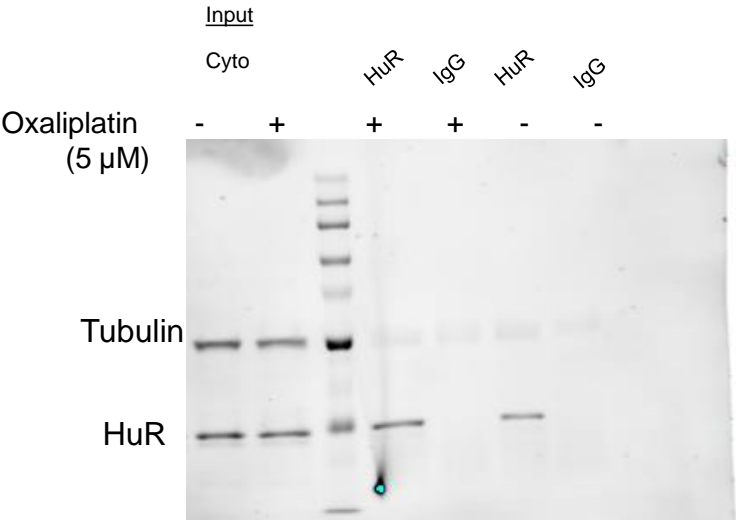

Fig S2c.

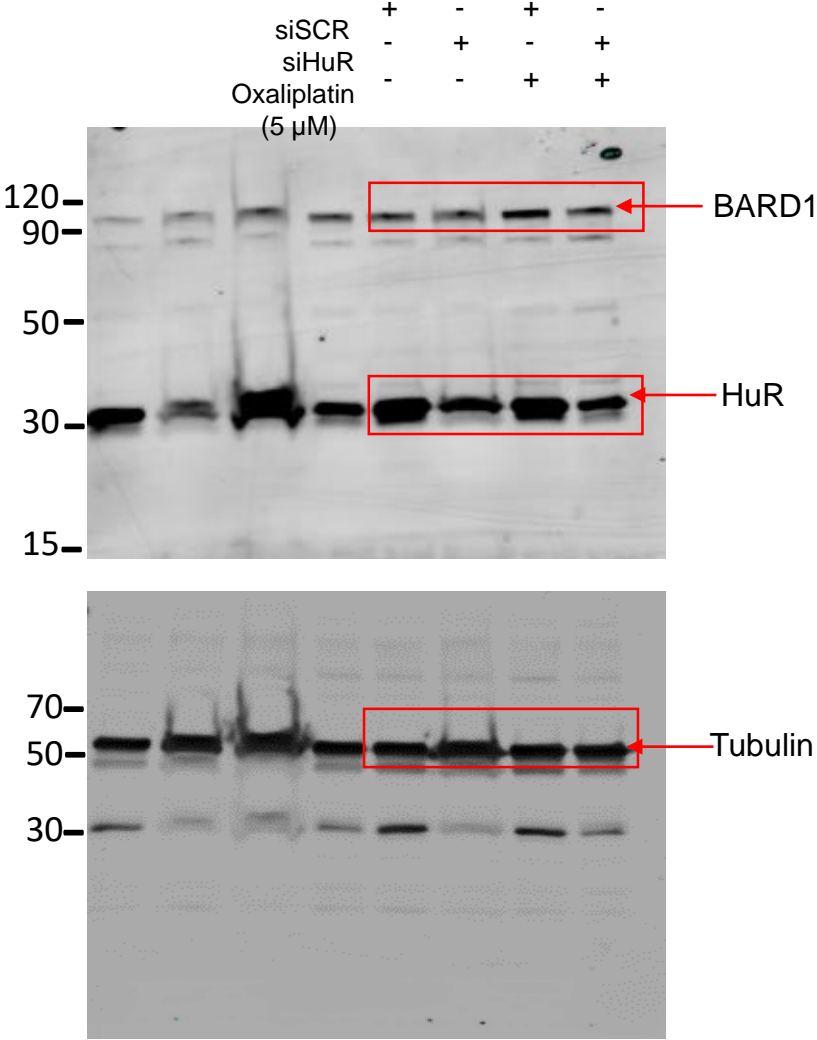

Fig 5D

MiaPaCa2

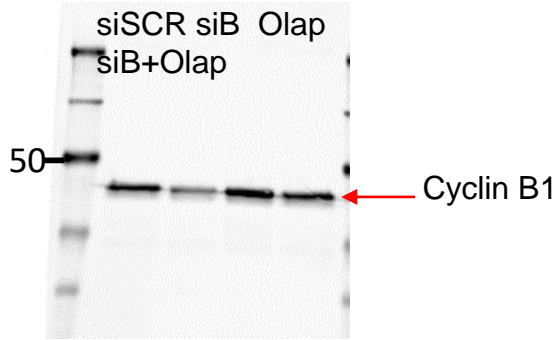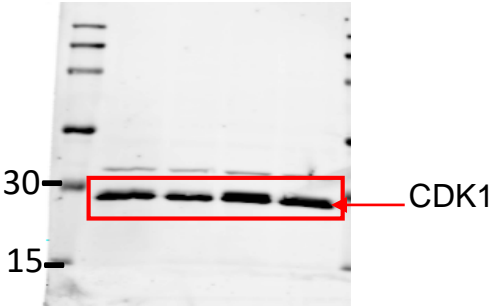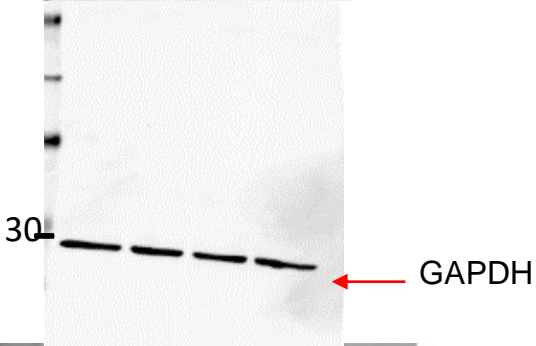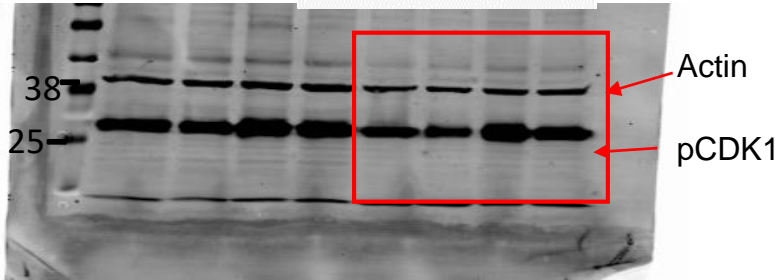

Panc-1

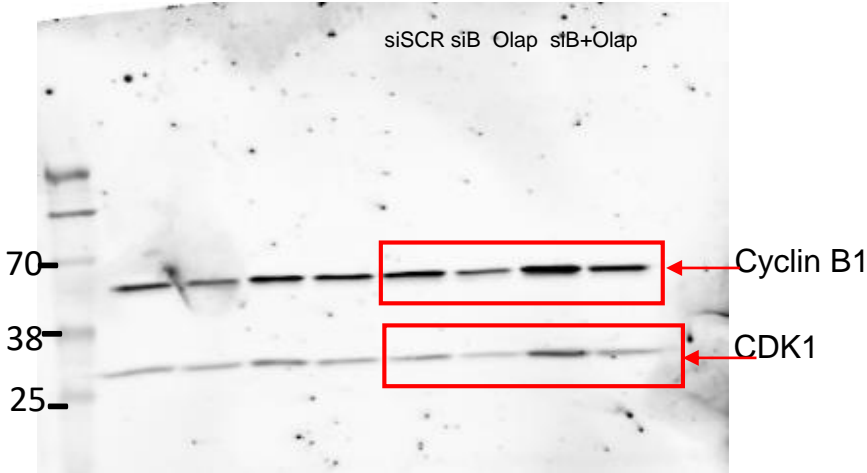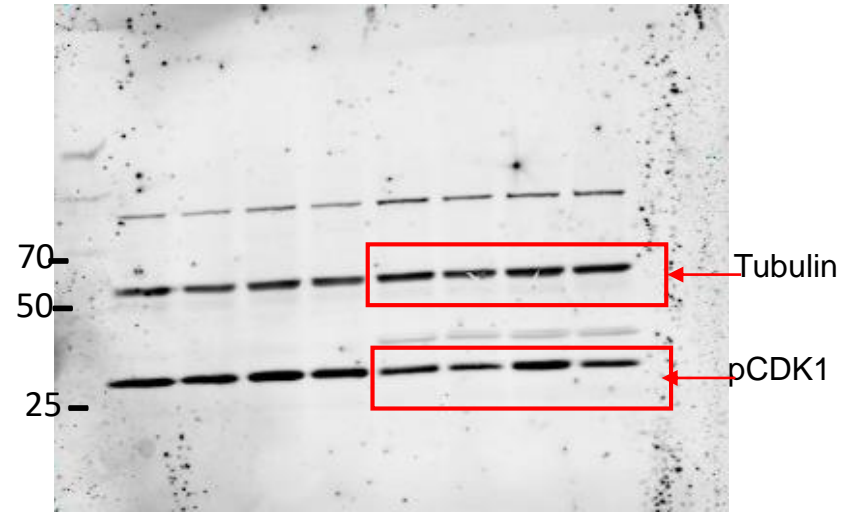

Figure 6b

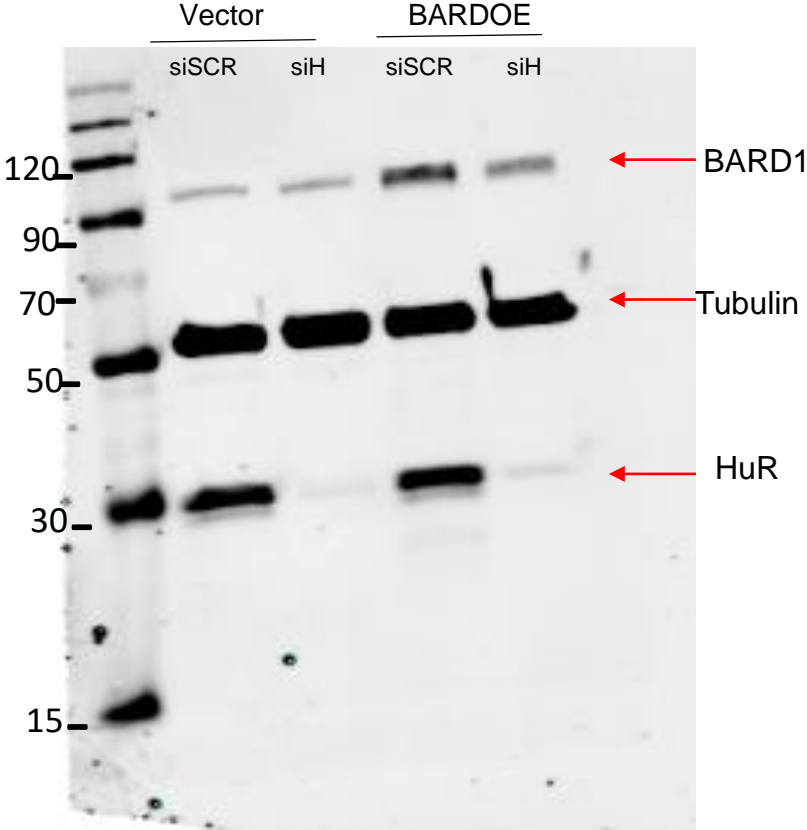

Supplement: s1 [file s1]
